# Supplementary material for: Ratiometric chemosensor for differentiation of TNP from other NACs using distinct blue fluorescence and visualization of latent fingerprints
Source: Royal Society of Chemistry journal article supplement (doi:10.1039/d0tc04795c), 2020-12-10
Supplement: d0tc04795c1.pdf [file d0tc04795c1.pdf]

## Supporting Information

### Ratiometric chemosensor for differentiation of TNP from other NACs by distinct blue fluorescence and visualization of latent fingerprints

Sukhvinder Dhiman<sup>a</sup>, Manzoor Ahmad<sup>a</sup>, Gulshan Kumar<sup>b</sup>, Vijay Luxami<sup>b</sup>, Prabhpreet Singh<sup>a</sup>, Subodh Kumar<sup>a\*</sup>

<sup>a\*</sup>Department of Chemistry, Center for Advanced Studies, Guru Nanak Dev University, Amritsar, Punjab, India

<sup>b</sup>School of Chemistry and Biochemistry, Thapar Institute of Engineering and Technology, Patiala, Punjab, India

| S.No | Content                                                                                                                                                                                                                                                                                                                                                                                                                                                                                                                                                                                                                                                          | Page No |
|------|------------------------------------------------------------------------------------------------------------------------------------------------------------------------------------------------------------------------------------------------------------------------------------------------------------------------------------------------------------------------------------------------------------------------------------------------------------------------------------------------------------------------------------------------------------------------------------------------------------------------------------------------------------------|---------|
| 1    | <b>Figure S1:</b> <sup>1</sup> H NMR spectrum of <b>DMAS-TP</b>                                                                                                                                                                                                                                                                                                                                                                                                                                                                                                                                                                                                  | 2       |
| 2    | <b>Figure S2:</b> <sup>13</sup> C NMR spectrum of <b>DMAS-TP</b>                                                                                                                                                                                                                                                                                                                                                                                                                                                                                                                                                                                                 | 2       |
| 3    | <b>Figure S3:</b> HRMS spectrum of <b>DMAS-TP</b>                                                                                                                                                                                                                                                                                                                                                                                                                                                                                                                                                                                                                | 3       |
| 4    | <b>Figure S4:</b> Change in (a) UV-VIS absorbance and (b) fluorescence intensity of <b>DMAS-TP</b> with increasing amounts of HEPES fraction.                                                                                                                                                                                                                                                                                                                                                                                                                                                                                                                    | 3       |
| 5    | <b>Figure S5:</b> (a) The effect of NACs on the absorbance of <b>DMAS-TP</b> ; NACs 0 = <b>DMAS-TP</b> ; 1 = 2,4,6-trinitrotoluene; 2 = 2,4,6-trinitrophenol; 3 = aniline; 4 = 1-chloro-3-nitroaniline; 5 = 2-nitroaniline; 6 = 2,4-dinitroaniline; 7 = 4-nitrophenol; 8 = 1-chloro-4-nitrophenol; 9 = 1-chloro-2,4-dinitrobenzene; 10 = 1-chloro-2-nitrobenzene; 11 = 2-nitrophenol; 12 = 4-nitrophenol; 13 = 1-methyl-2-nitrobenzene; 14 = 2,4-dinitrotoluene; 15 = 4-nitrobenzaldehyde; 16 = 2-nitrobenzaldehyde; 17 = 3,5-dinitrobenzoic acid; 18 = 2,6-dinitrotoluene; (b-c) the formation of different stoichiometric species of <b>DMAS-TP</b> with [TNP] | 4       |
| 6    | <b>Figure S6:</b> Effect of different inorganic anions (10 equivalents) on the (a) absorption and (b) fluorescence spectrum of <b>DMAS-TP</b> .                                                                                                                                                                                                                                                                                                                                                                                                                                                                                                                  | 4       |
| 7    | <b>Figure S7:</b> The effect of different NACs on the fluorescence intensity of <b>DMAS-TP</b> (10 μM, HEPES buffer pH 7.4, 0.1% DMSO)                                                                                                                                                                                                                                                                                                                                                                                                                                                                                                                           | 5       |
| 8    | <b>Figure S8:</b> Plot of change in the fluorescence intensity of <b>DMAS-TP</b> at 615 nm and 521 nm (a) on gradual addition of TNP and (b) on gradual addition of TNT                                                                                                                                                                                                                                                                                                                                                                                                                                                                                          | 5       |
| 9    | <b>Figure S9:</b> (a) The fit model for the titration of <b>DMAS-TP</b> with TNP; (b) The stoichiometric formation of <b>DMAS-TP</b> ∩(TNP) <sub>2</sub>                                                                                                                                                                                                                                                                                                                                                                                                                                                                                                         | 5       |
| 10   | <b>Figure S10:</b> Change in fluorescence intensity at 480 nm on titration of <b>DMAS-TP</b> with (a) TNP and (b) with TNT using excitation wavelength 390 nm.                                                                                                                                                                                                                                                                                                                                                                                                                                                                                                   | 6       |
| 11   | <b>Table S1: the comparison table of <b>DMAS-TP</b> with other fluorescence probes</b>                                                                                                                                                                                                                                                                                                                                                                                                                                                                                                                                                                           | 6       |
| 12   | <b>Figure S11-</b> Effect of 300W xenon lamp on fluorescence spectrum (a) and intensity (b) of <b>DMAS-TP</b> with increasing time                                                                                                                                                                                                                                                                                                                                                                                                                                                                                                                               | 7       |
| 13   | <b>Figure S12:</b> (a) The fit model for the titration of <b>DMAS-TP</b> with TNT; (b) The stoichiometric formation of <b>DMAS-TP</b> ∩TNT and <b>DMAS-TP</b> ∩(TNT) <sub>3</sub>                                                                                                                                                                                                                                                                                                                                                                                                                                                                                | 7       |
| 14   | <b>Table S1.</b> The electronic excitation wavelength (nm), oscillator strengths and compositions of the low-lying singlet excited states of the <b>DMAS-TP-B</b> and                                                                                                                                                                                                                                                                                                                                                                                                                                                                                            | 7       |

|           |                                                                                                                                                                                                                                                                                                                     |          |
|-----------|---------------------------------------------------------------------------------------------------------------------------------------------------------------------------------------------------------------------------------------------------------------------------------------------------------------------|----------|
|           | its complex <b>DMAS-TP-B</b> $\cap$ ( <b>TNP</b> ) <sub>2</sub>                                                                                                                                                                                                                                                     |          |
| <b>15</b> | <b>Figure S13:</b> (A,B) DLS studies in water (0.1% DMSO) (A) <b>DMAS-TP</b> and TNT solution; (B) <b>DMAS-TP</b> and DNT solution (C, D) thin films using fluorescence microscopic (C) <b>DMAS-TP</b> and TNT (5 equiv.); (D) <b>DMAS-TP</b> and DNT (5 equiv.) solution                                           | <b>8</b> |
| <b>16</b> | <b>Figure S14.</b> MOs of <b>DMAS-TP-B</b> and <b>DMAS-TP-B.2TNPs</b>                                                                                                                                                                                                                                               | <b>8</b> |
| <b>17</b> | <b>Figure S15:</b> The comparison of UV-Vis spectrum obtained theoretically from optimized structures of <b>DMAS-TP-A</b> $\cap$ ( <b>TNP</b> ) <sub>2</sub> and <b>DMAS-TP-B</b> $\cap$ ( <b>TNP</b> ) <sub>2</sub> with those found from addition of 2 and 3 equivalents of TNP to the solution of <b>DMAS-TP</b> | <b>9</b> |

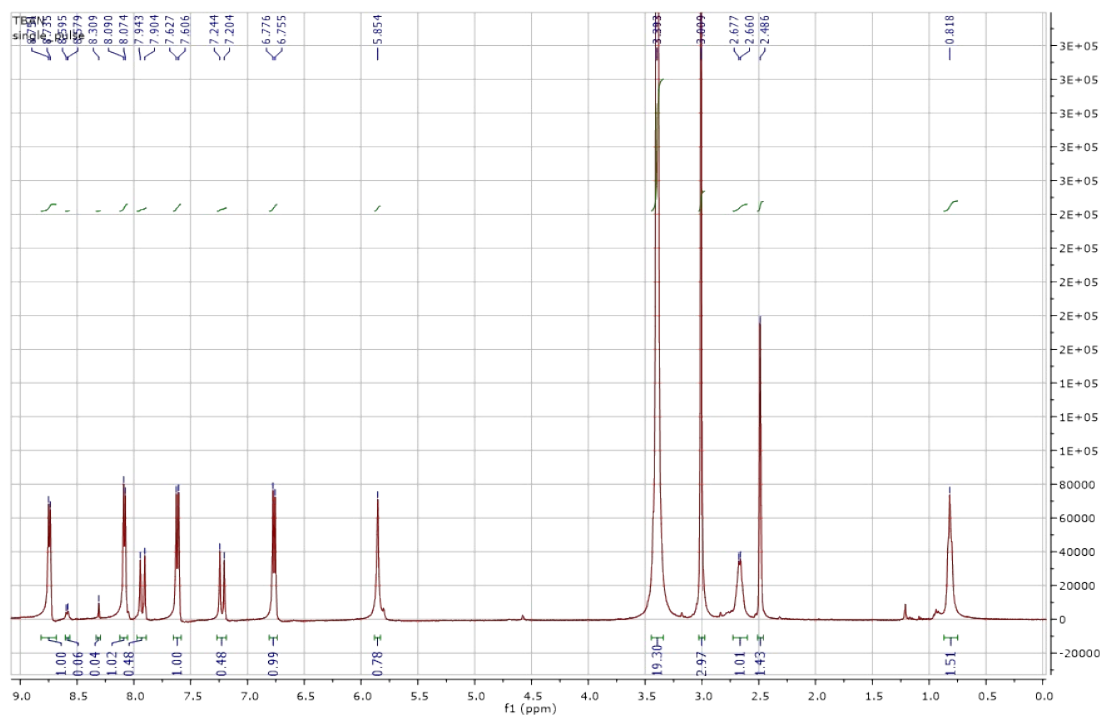

**Figure S1:** <sup>1</sup>H NMR spectrum of **DMAS-TP**

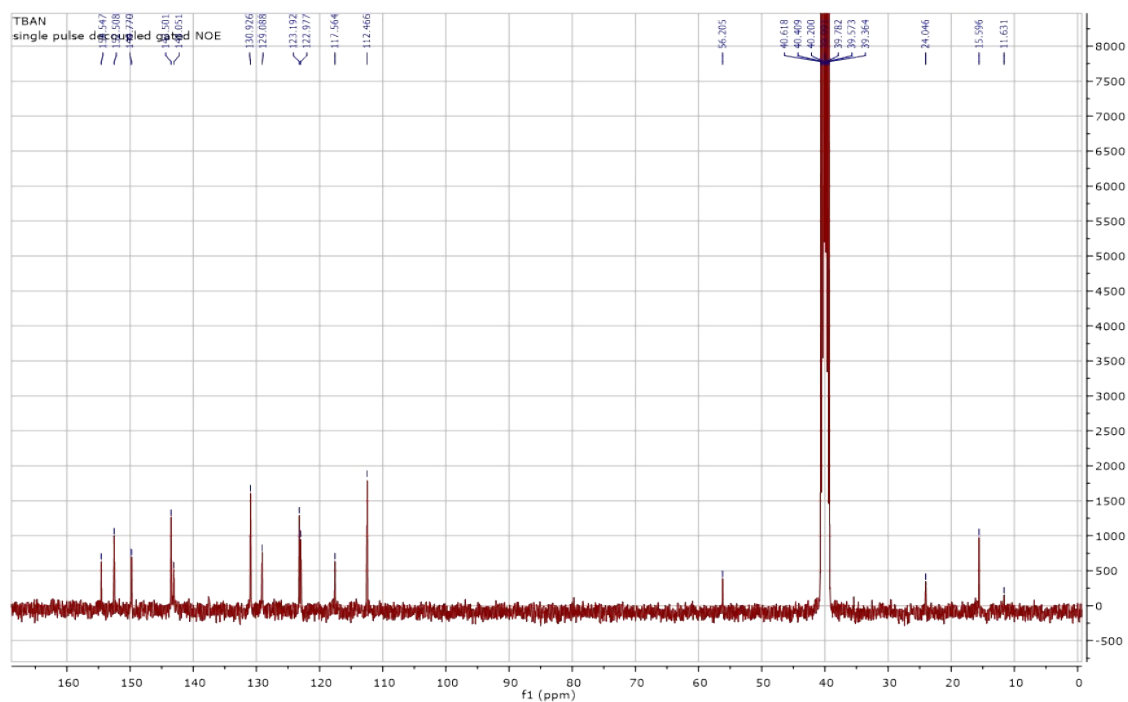

**Figure S2:**  $^{13}\text{C}$  NMR spectrum of DMAS-TP

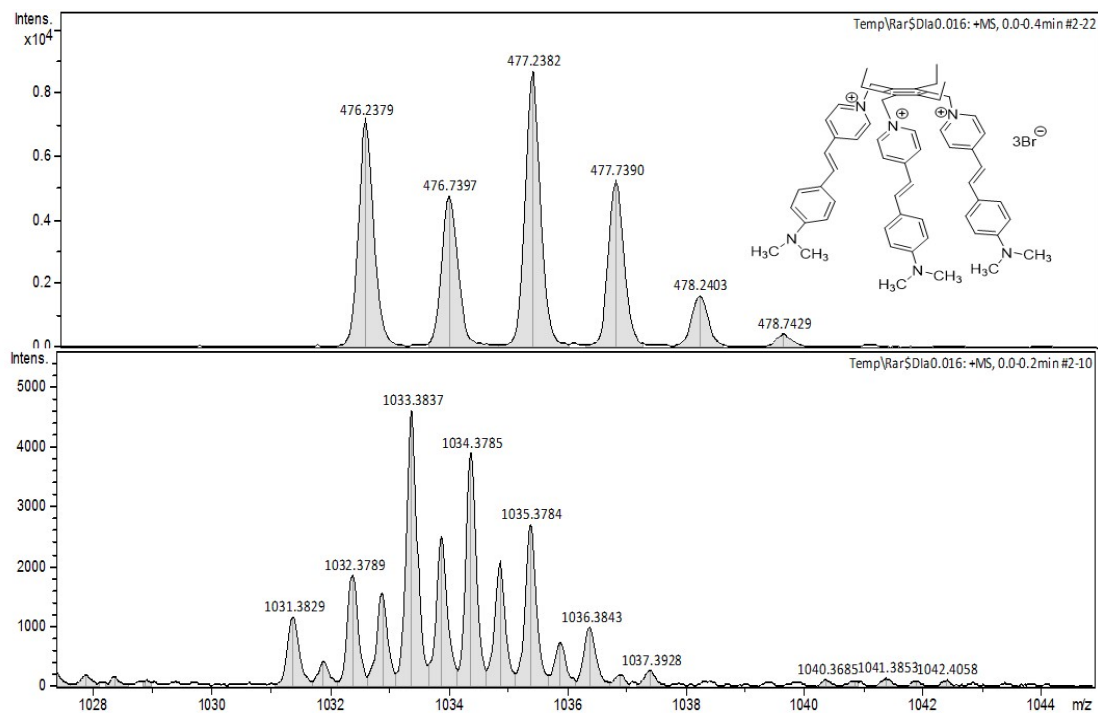

**Figure S3:** HRMS spectrum of DMAS-TP

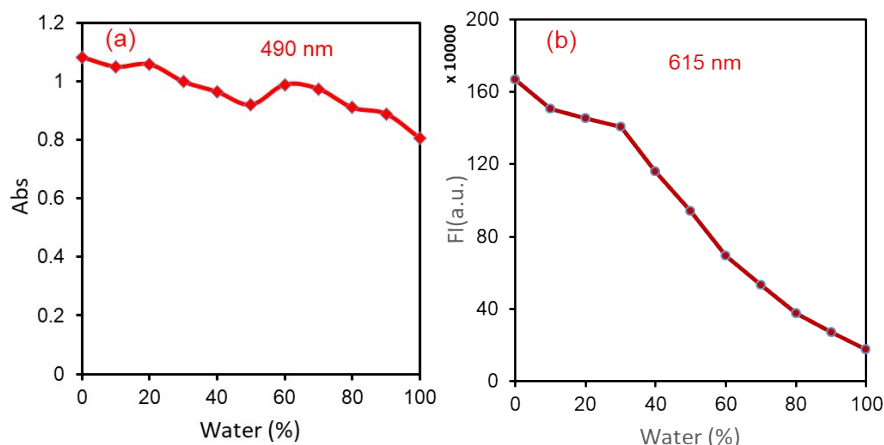

**Figure S4:** Change in (a) UV-Vis absorbance and (b) fluorescence intensity of DMAS-TP with increasing amounts of HEPES fraction.

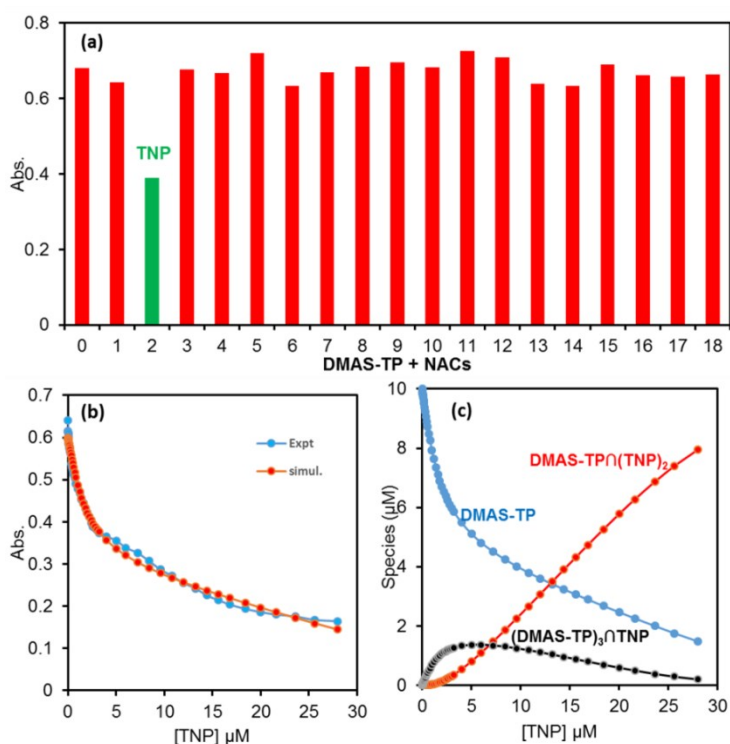

**Figure S5:** (a) The effect of NACs on the absorbance of DMAS-TP; NACs 0 = DMAS-TP; 1 = 2,4,6-trinitrotoluene; 2 = 2,4,6-trinitrophenol; 3 = aniline; 4 = 1-chloro-3-nitroaniline; 5 = 2-nitroaniline; 6 = 2,4-dinitroaniline; 7 = 4-nitrophenol; 8 = 1-chloro-4-nitrophenol; 9 = 1-chloro-2,4-dinitrobenzene; 10 = 1-chloro-2-nitrobenzene; 11 = 2-nitrophenol; 12 = 4-nitrophenol; 13 = 1-methyl-2-nitrobenzene; 14 = 2,4-dinitrotoluene; 15 = 4-nitrobenzaldehyde; 16 = 2-nitrobenzaldehyde; 17 = 3,5-dinitrobenzoic acid; 18 = 2,6-dinitrotoluene; (b-c) the formation of different stoichiometric species of DMAS-TP with [TNP]

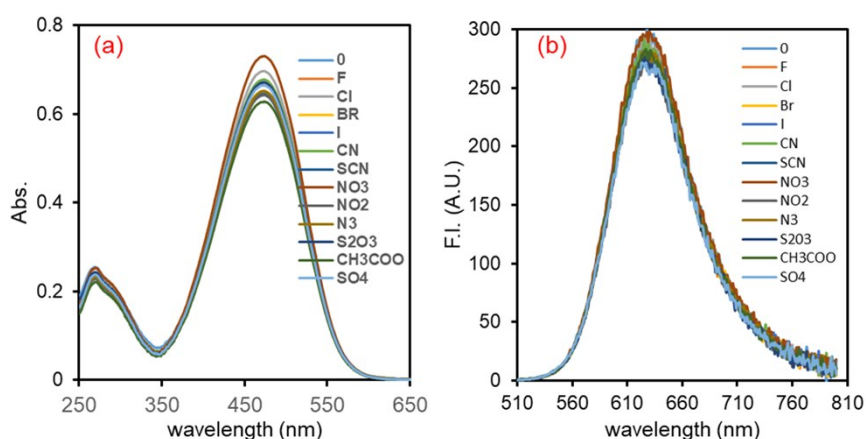

**Figure S6:** Effect of different inorganic anions (10 equivalents) on the (a) absorption and (b) fluorescence spectrum of **DMAS-TP**.

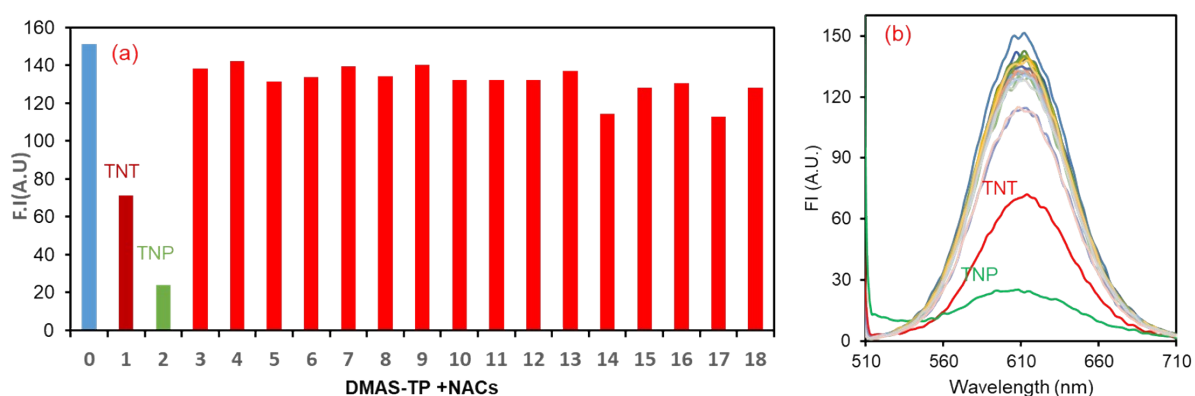

**Figure S7:** The effect of different NACs on the fluorescence intensity of **DMAS-TP** (10  $\mu\text{M}$ , HEPES buffer pH 7.4, 0.1% DMSO). NACs 0 = DMAS-TP; 1 = 2,4,6-trinitrotoluene; 2 = 2,4,6-trinitrophenol; 3 = aniline; 4 = 1-chloro-3-nitroaniline; 5 = 2-nitroaniline; 6 = 2,4-dinitroaniline; 7 = 4-nitrophenol; 8 = 1-chloro-4-nitrophenol; 9 = 1-chloro-2,4-dinitrobenzene; 10 = 1-chloro-2-nitrobenzene; 11 = 2-nitrophenol; 12 = 4-nitrophenol; 13 = 1-methyl-2-nitrobenzene; 14 = 2,4-dinitrotoluene; 15 = 4-nitrobenzaldehyde; 16 = 2-nitrobenzaldehyde; 17 = 3,5-dinitrobenzoic acid; 18 = 2,6-dinitrotoluene; (a) fluorescence intensity; (b) fluorescence spectra (showing increase in fluorescence intensity between 510-540 nm only in case of TNP)

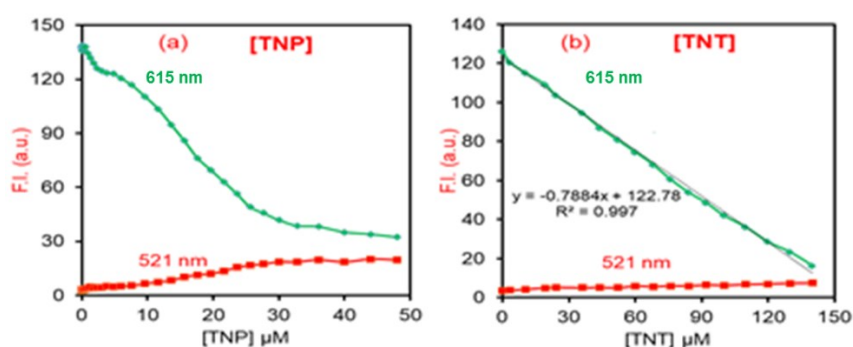

**Figure S8:** Plot of change in the fluorescence intensity of **DMAS-TP** at 615 nm and 521 nm (a) on gradual addition of TNP and (b) on gradual addition of TNT

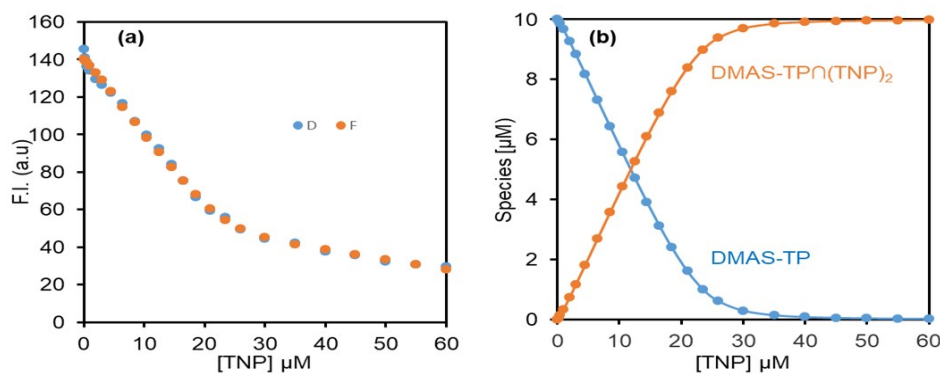

**Figure S9:** (a) The fit model for the titration of **DMAS-TP** with TNP; (b) The stoichiometric formation of **DMAS-TP(TNP)<sub>2</sub>**

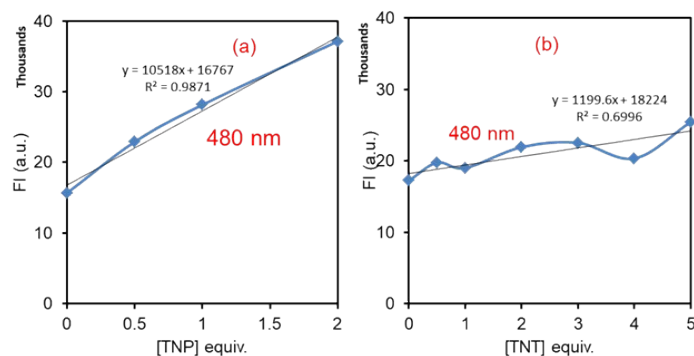

**Figure S10:** Change in fluorescence intensity at 480 nm on titration of **DMAS-TP** with (a) TNP and (b) with TNT using excitation wavelength 390 nm.

**Table S1: the comparison table of DMAS-TP with other fluorescence probes**

| Publication                                       | Fluorophore     | solvent                    | $\lambda_{em}$ (nm) | LOD FL    | $\lambda_{abs}$ (nm) | LOD abs | Paper strip |
|---------------------------------------------------|-----------------|----------------------------|---------------------|-----------|----------------------|---------|-------------|
| Present                                           | Single molecule | Water                      | 615                 | 2 nM      | 490                  | 20 nM   | Turn-ON     |
| ACS Appl. Mater. Interfaces 2018, 10, 27260–27268 | polymer         | 95 % water                 | 501-520             | 473 nM    | 430                  | ---     | quenching   |
| Analyst, 2019,144, 3620-3634                      | Single molecule | water                      | 400-480             | 6000 nM   | 374                  | --      | quenching   |
| J. Mater. Chem. C, 2020,8, 8257-8267              | Single molecule | H <sub>2</sub> O/THF (9/1) | 635                 | 61.4 nM   | ---                  | ---     | quenching   |
| Anal. Chem. 2019, 91, 13244–13250                 | Single molecule | DMSO                       | 530                 | 63 nM     | ---                  | no      |             |
| Dyes and Pigments, 2018, 156, 307-317.            | Single molecule | water                      | 480                 | 0.0001 nM | 340                  | ---     | quenching   |

|                                                     |                 |                      |            |         |     |      |           |
|-----------------------------------------------------|-----------------|----------------------|------------|---------|-----|------|-----------|
| RSC Adv., 2018, 8, 31658–31665                      | Single molecule | methanol             | 420 to 586 | 820 nM, | 500 | ---  | quenching |
| Sensors & Actuators: B. Chemical 280 (2019) 298–305 | Single molecule | CH <sub>3</sub> CN   | 550        | ----    | 520 | --   | ---       |
| Sensors and Actuators B 231 (2016) 293–301          | Single molecule | PBS–DMSO (99.5:0.5 ) | 494        | 10 nM   | 336 | ---- | quenching |
| Sensors and Actuators B 265 (2018) 476–487          | Single molecule | EtOH                 | 518        | 77.5 nM | 365 | ---- | quenching |
| Inorg. Chem. 2019, 58, 8198–8207                    | MOF             | EtOH                 | 480-580    | 7.2 nM  | 380 | ---  | ---       |
| ACS Sustainable Chem. Eng. 2019, 7, 819–830         | MOF 1           | aqueous suspension   | 437, 637   | 40 nM   | 333 | --   | ----      |

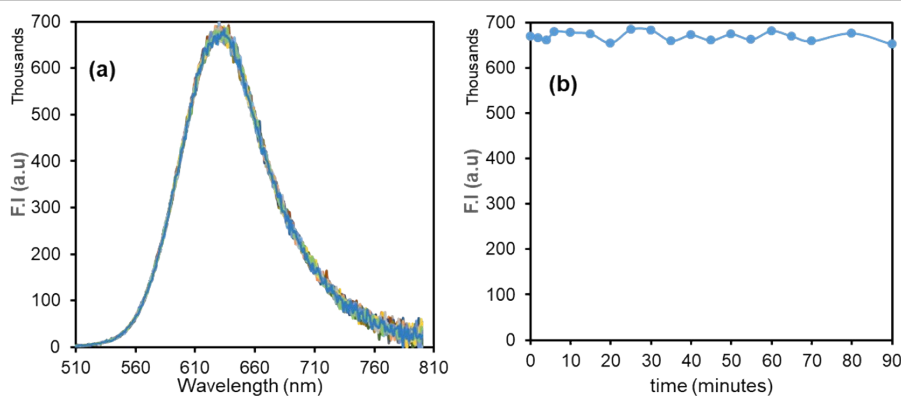

Figure S11- Effect of 300W xenon lamp on (a) fluorescence spectrum and (b) fluorescence intensity of **DMAS-TP** with increasing time.

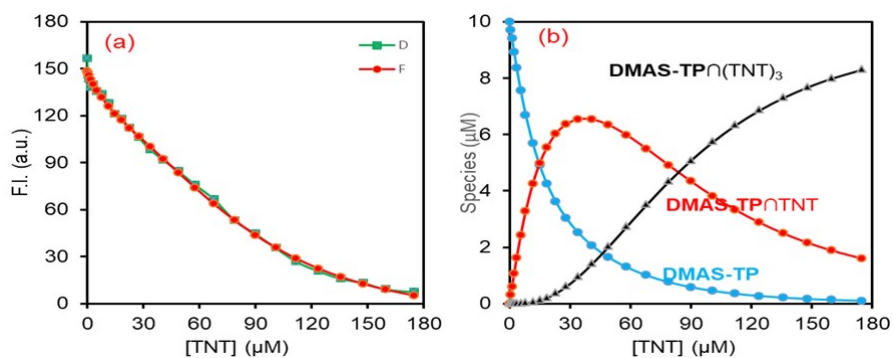

**Figure S12:** (a) The fit model for the titration of **DMAS-TP** with TNT; (b) The stoichiometric formation of **DMAS-TP∩TNT** and **DMAS-TP∩(TNT)<sub>3</sub>**

**Table S2. The electronic excitation wavelength (nm), oscillator strengths and**

compositions of the low-lying singlet excited states of the DMAS-TP-B and its complex DMAS-TP-B $\cap$ (TNP)<sub>2</sub>

| Symmetry                                           | $\lambda$<br>(nm) | f      | Contributing orbitals<br>(%)                                  | Natural transition orbitals<br>(occupancy)                               |
|----------------------------------------------------|-------------------|--------|---------------------------------------------------------------|--------------------------------------------------------------------------|
| <b>DMAS-TP-B</b>                                   |                   |        |                                                               |                                                                          |
| Singlet-A                                          | 479.7             | 0.8457 | H-2 $\rightarrow$ LUMO (46 %)<br>H-1 $\rightarrow$ L+1 (40 %) | HONTO $\rightarrow$ LUNTO (51 %)<br>HONTO-1 $\rightarrow$ LUNTO+1 (45 %) |
| Singlet-A                                          | 475.8             | 4.055  | HOMO $\rightarrow$ L+2 (67 %)<br>H-1 $\rightarrow$ L+1 (16 %) | HONTO $\rightarrow$ LUNTO (72 %)<br>HONTO-1 $\rightarrow$ LUNTO+1 (17 %) |
| <b>DMAS-TP-B<math>\cap</math>(TNP)<sub>2</sub></b> |                   |        |                                                               |                                                                          |
| Singlet-A                                          | 478.6             | 1.5865 | H-1 $\rightarrow$ L+2 (91 %)                                  | HONTO $\rightarrow$ LUNTO (96 %)                                         |
| Singlet-A                                          | 378.3             | 2.4512 | H-8 $\rightarrow$ L+1 (79 %)                                  | HONTO $\rightarrow$ LUNTO (85 %)                                         |

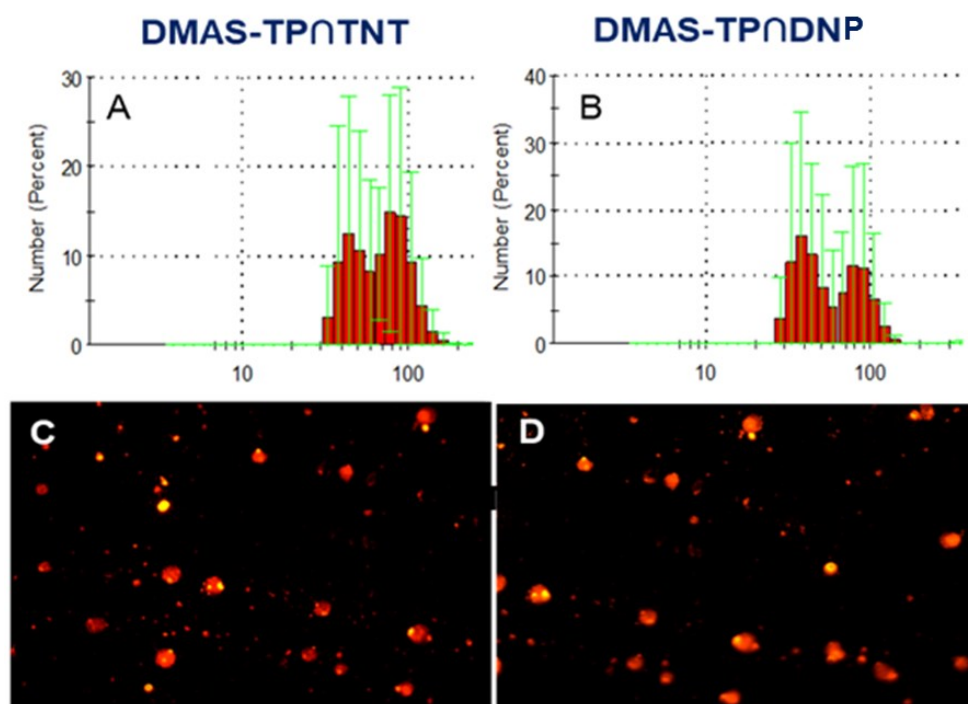

**Figure S13:** (A,B) DLS studies in water (0.1% DMSO) (A) **DMAS-TP** and TNT solution; (B) **DMAS-TP** and DNP solution (C, D) thin films using fluorescence microscopic (C) **DMAS-TP** and TNT (5 equiv.); (D) **DMAS-TP** and DNP (5 equiv.) solution



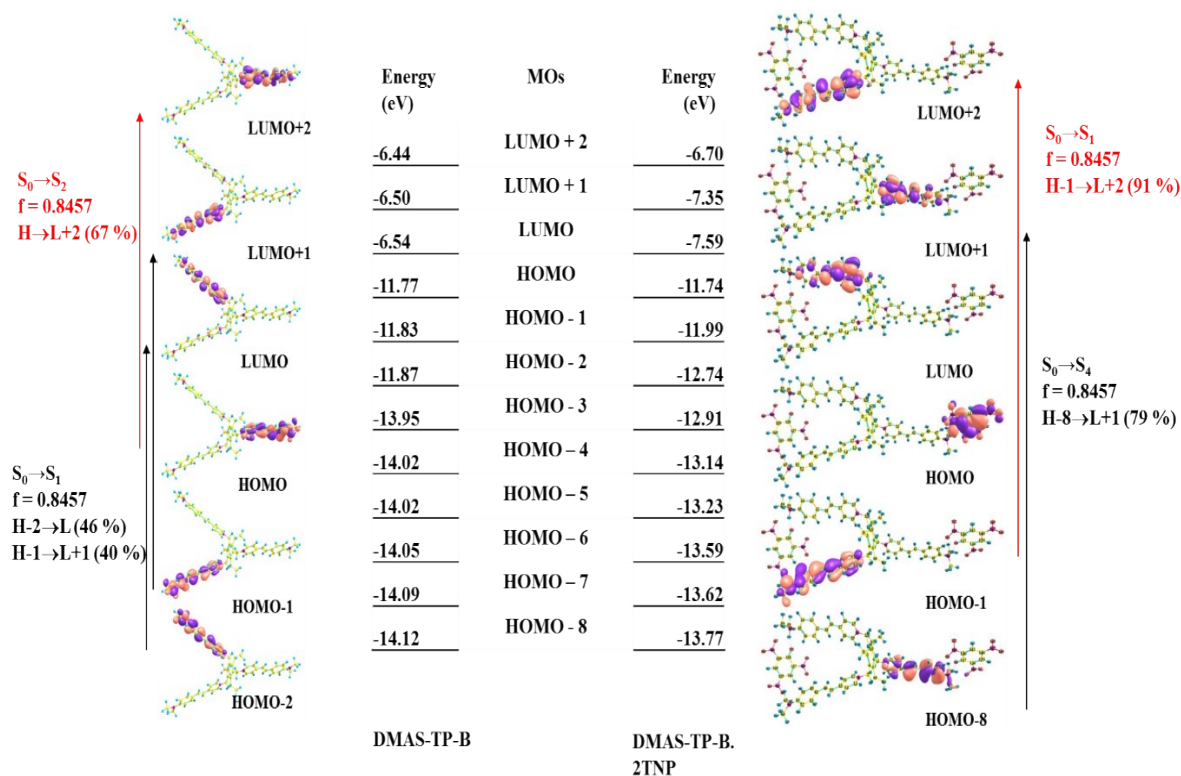

**Figure S14.** MOs of **DMAS-TP-B** and **DMAS-TP-B.2TNP**s

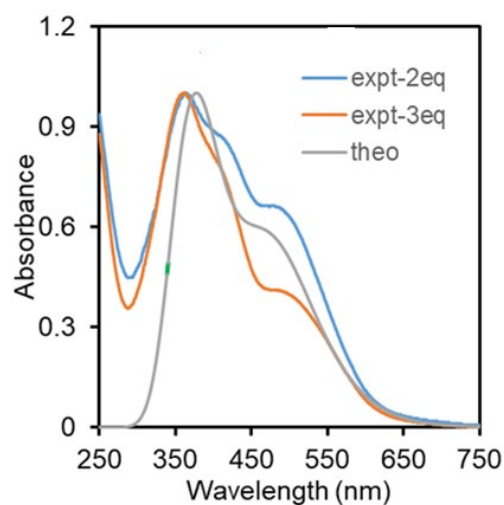

**Figure S15:** The comparison of UV-Vis spectrum obtained theoretically from optimized structures of **DMAS-TP**∩(**TNP**)<sub>2</sub> with those found from addition of 2 and 3 equivalents of **TNP** to the solution of **DMAS-TP**
